# Supplementary material for: High‐Sensitivity C‐Reactive Protein Discordance With Atherogenic Lipid Measures and Incidence of Atherosclerotic Cardiovascular Disease in Primary Prevention: The ARIC Study
Source: PubMed Central journal article supplement — J Am Heart Assoc. 2020 Jan 30;9(3):e013600. doi: 10.1161/JAHA.119.013600 (PMC7033866; doi:10.1161/jaha.119.013600), 2020-01-30

# **SUPPLEMENTAL MATERIAL**

**Table S1. Hazard Ratios (95%CI) for ASCVD events across concordant/discordant groups by medians: the Atherosclerosis Risk in Communities Study (1996-2016).**

| Lipid Target Groups                                               | hsCRP    | n ASCVD events/<br>n individuals | Model 1<br>HR (95%CI) | Model 2<br>HR (95%CI) | Model 3<br>HR (95%CI) | Model 4<br>HR (95%CI) |
|-------------------------------------------------------------------|----------|----------------------------------|-----------------------|-----------------------|-----------------------|-----------------------|
| <b>LDL-C &lt; median</b><br>(n=4,797)                             | < median | 308/2,438                        | REF                   | REF                   | REF                   | REF                   |
|                                                                   | ≥ median | 379/2,359                        | 1.49 (1.28-1.75)      | 1.34 (1.13-1.59)      | 1.29 (1.09-1.54)      | 1.30 (1.09-1.54)      |
| <b>LDL-C ≥ median</b><br>(n=4,951)                                | < median | 373/2,432                        | REF                   | REF                   | REF                   | REF                   |
|                                                                   | ≥ median | 514/2,519                        | 1.58 (1.38-1.81)      | 1.35 (1.16-1.58)      | 1.33 (1.14-1.54)      | 1.32 (1.13-1.53)      |
| <b>Dual lipids &lt; median</b><br>(n=4,445)                       | < median | 283/2,295                        | REF                   | REF                   | REF                   | REF                   |
|                                                                   | ≥ median | 340/2,150                        | 1.50 (1.27-1.77)      | 1.37 (1.14-1.65)      | 1.33 (1.11-1.60)      | 1.33 (1.11-1.60)      |
| <b>Dual lipids ≥ median</b><br>(n=4,549)                          | < median | 350/2,211                        | REF                   | REF                   | REF                   | REF                   |
|                                                                   | ≥ median | 485/2,338                        | 1.57 (1.37-1.81)      | 1.38 (1.18-1.61)      | 1.36 (1.16-1.60)      | 1.35 (1.16-1.58)      |
| <b>Triple lipids &lt; median</b><br>(n=3,938)                     | < median | 237/2,060                        | REF                   | REF                   | REF                   | REF                   |
|                                                                   | ≥ median | 290/1,878                        | 1.57 (1.31-1.88)      | 1.46 (1.19-1.78)      | 1.42 (1.16-1.74)      | 1.42 (1.16-1.73)      |
| <b>Triple lipids ≥ median</b><br>(n=4,064)                        | < median | 315/1,954                        | REF                   | REF                   | REF                   | REF                   |
|                                                                   | ≥ median | 442/2,110                        | 1.56 (1.34-1.81)      | 1.33 (1.13-1.57)      | 1.32 (1.12-1.56)      | 1.31 (1.11-1.55)      |
| <b>Quadruple lipids &lt; median</b><br>(n=3,120)                  | < median | 171/1,660                        | REF                   | REF                   | REF                   | N/A                   |
|                                                                   | ≥ median | 207/1,460                        | 1.62 (1.31-2.01)      | 1.60 (1.26-2.02)      | 1.56 (1.23-1.98)      | N/A                   |
| <b>Quadruple lipids ≥ median</b><br>(n=3,079)                     | < median | 257/1,460                        | REF                   | REF                   | REF                   | N/A                   |
|                                                                   | ≥ median | 362/1,619                        | 1.52 (1.29-1.79)      | 1.30 (1.08-1.56)      | 1.29 (1.08-1.55)      | N/A                   |
| <b>Quadruple lipids &lt; median + HDL-C ≥ median</b><br>(n=2,971) | < median | 159/1,574                        | REF                   | REF                   | REF                   | N/A                   |
|                                                                   | ≥ median | 189/1,397                        | 1.58 (1.26-1.97)      | 1.59 (1.25-2.03)      | 1.56 (1.22-1.99)      | N/A                   |
| <b>Quadruple lipids ≥ median + HDL-C &lt; median</b><br>(n=1,253) | < median | 116/557                          | REF                   | REF                   | REF                   | N/A                   |
|                                                                   | ≥ median | 174/696                          | 1.43 (1.12-1.82)      | 1.25 (0.96-1.64)      | 1.26 (0.96-1.65)      | N/A                   |

Dual lipids: LDL-C + non-HDL-C; Triple lipids: LDL-C + non-HDL-C + apoB. Quadruple lipids: LDL-C + non-HDL-C + apoB + TC/HDL-C

hsCRP <median groups are reference.

**Medians: LDL-C: 123 mg/dL, non-HDL-C: 149 mg/dL, apoB: 98 mg/dL, TC/HDL: 4.2, HDL-C: 40 mg/dL, hsCRP: 2.4 mg/L**

Model 1: adjusted for age, sex, race/center

Model 2: Model 1 + physical activity + smoking status + BMI+ systolic blood pressure + treatment for hypertension + diabetes + lipid-lowering medication use

Model 3: Model 2 + log-triglycerides

Model 4: Model 3 + log-HDL-C.

N/A: Not applicable

SI conversion factors: To convert total, LDL-C and HDL-C to mmol/L, multiply by 0.0249. To convert triglycerides to mmol/L, multiply by 0.0113.

**Table S2. Hazard Ratios (95%CI) for ASCVD events across concordant/discordant groups by risk categories in medians: the Atherosclerosis Risk in Communities Study (1996-2016).**

| Lipid Target Groups                                              | hsCRP    | Low risk (<7.5%)                 |                  | High risk (≥7.5%)                |                  |
|------------------------------------------------------------------|----------|----------------------------------|------------------|----------------------------------|------------------|
|                                                                  |          | n ASCVD events/<br>n individuals | HR (95%CI)       | n ASCVD events/<br>n individuals | HR (95%CI)       |
| <b>LDL-C &lt; median</b><br>(n=4,797)                            | < median | 96/1,239                         | REF              | 208/1,175                        | REF              |
|                                                                  | ≥ median | 156/1,254                        | 1.70 (1.32-2.19) | 219/1,085                        | 1.24 (1.02-1.49) |
| <b>LDL-C ≥ median</b><br>(n=4,951)                               | < median | 93/1,007                         | REF              | 277/1,406                        | REF              |
|                                                                  | ≥ median | 155/1,113                        | 1.58 (1.23-2.05) | 353/1,388                        | 1.42 (1.21-1.67) |
| <b>Dual lipids &lt; median</b><br>(n=4,445)                      | < median | 90/1,193                         | REF              | 190/1,080                        | REF              |
|                                                                  | ≥ median | 143/1,162                        | 1.72 (1.32-2.24) | 193/969                          | 1.23 (1.01-1.51) |
| <b>Dual lipids ≥ median</b><br>(n=4,549)                         | < median | 86/887                           | REF              | 262/1,307                        | REF              |
|                                                                  | ≥ median | 146/1,030                        | 1.53 (1.17-2.00) | 335/1,294                        | 1.44 (1.22-1.69) |
| <b>Triple lipids &lt; median</b><br>(n=3,938)                    | < median | 80/1,091                         | REF              | 154/948                          | REF              |
|                                                                  | ≥ median | 125/1,010                        | 1.79 (1.35-2.37) | 162/851                          | 1.27 (1.02-1.59) |
| <b>Triple lipids ≥ median</b><br>(n=4,064)                       | < median | 75/779                           | REF              | 238/1,162                        | REF              |
|                                                                  | ≥ median | 134/931                          | 1.57 (1.18-2.08) | 304/1,169                        | 1.42 (1.20-1.69) |
| <b>Quadruple lipids &lt; median</b><br>(n=3,120)                 | < median | 65/955                           | REF              | 104/688                          | REF              |
|                                                                  | ≥ median | 96/857                           | 1.73 (1.26-2.37) | 110/591                          | 1.35 (1.03-1.77) |
| <b>Quadruple lipids ≥ median</b><br>(n=3,079)                    | < median | 56/507                           | REF              | 199/942                          | REF              |
|                                                                  | ≥ median | 101/651                          | 1.47 (1.06-2.04) | 258/962                          | 1.42 (1.18-1.71) |
| <b>Quadruple lipids &lt;median + HDL-C ≥ median</b><br>(n=2,971) | < median | 61/913                           | REF              | 96/644                           | REF              |
|                                                                  | ≥ median | 89/835                           | 1.67 (1.21-2.32) | 99/550                           | 1.31 (0.99-1.74) |
| <b>Quadruple lipids ≥median + HDL-C &lt;median</b><br>(n=1,253)  | < median | 18/139                           | REF              | 96/413                           | REF              |
|                                                                  | ≥ median | 45/243                           | 1.51 (0.88-2.62) | 126/449                          | 1.37 (1.05-1.79) |

Dual lipids: LDL-C + non-HDL-C; Triple lipids: LDL-C + non-HDL-C + apoB. Quadruple lipids: LDL-C + non-HDL-C + apoB + TC/HDL-C  
hsCRP <median groups are reference.

**Medians: LDL-C: 123 mg/dL, non-HDL-C: 149 mg/dL, apoB: 98 mg/dL, TC/HDL: 4.2, HDL-C: 40 mg/dL, hsCRP: 2.4 mg/L**

Models adjusted for lipid-lowering medication use

N/A: Not applicable

SI conversion factors: To convert total, LDL-C and HDL-C to mmol/L, multiple by 0.0249. To convert triglycerides to mmol/L, multiple by 0.0113

**Table S3. Hazard Ratios (95%CI) for coronary death (competing risk) across concordant/discordant groups by medians: the Atherosclerosis Risk in Communities Study (1996-2016).**

| Lipid Target Groups                              | hsCRP    | n coronary deaths/<br>n individuals | Model 1<br>HR (95%CI) | Model 2<br>HR (95%CI) | Model 3<br>HR (95%CI) | Model 4<br>HR (95%CI) |
|--------------------------------------------------|----------|-------------------------------------|-----------------------|-----------------------|-----------------------|-----------------------|
| <b>Triple lipids &lt; median</b><br>(n=3,938)    | < median | 41/2,060                            | REF                   | REF                   | REF                   | REF                   |
|                                                  | ≥ median | 75/1,878                            | 2.30 (1.56-3.39)      | 1.82 (1.19-2.80)      | 1.83 (1.19-2.80)      | 1.81 (1.18-2.77)      |
| <b>Triple lipids ≥ median</b><br>(n=4,064)       | < median | 48/1,954                            | REF                   | REF                   | REF                   | REF                   |
|                                                  | ≥ median | 92/2,110                            | 2.00 (1.40-2.87)      | 1.65 (1.11-2.46)      | 1.63 (1.09-2.44)      | 1.61 (1.08-2.42)      |
| <b>Quadruple lipids &lt; median</b><br>(n=3,120) | < median | 27/1,660                            | REF                   | REF                   | REF                   | N/A                   |
|                                                  | ≥ median | 51/1,460                            | 2.53 (1.57-4.06)      | 2.30 (1.37-3.87)      | 2.31 (1.37-3.88)      | N/A                   |
| <b>Quadruple lipids ≥ median</b><br>(n=3,079)    | < median | 41/1,460                            | REF                   | REF                   | REF                   | N/A                   |
|                                                  | ≥ median | 78/1,619                            | 1.91 (1.29-2.82)      | 1.56 (1.03-2.37)      | 1.56 (1.03-2.37)      | N/A                   |

hsCRP <median groups are reference. Triple lipids: LDL-C + non-HDL-C + apoB. Quadruple lipids: LDL-C + non-HDL-C + apoB + TC/HDL-C

**Medians: LDL-C: 123 mg/dL, non-HDL-C: 149 mg/dL, apoB: 98 mg/dL, TC/HDL: 4.2, HDL-C: 40 mg/dL, hsCRP: 2.4 mg/L**

**Competing event: non-coronary death**

Model 1: adjusted for age, sex, race/center

Model 2: Model 1 + physical activity + smoking status + BMI+ systolic blood pressure + treatment for hypertension + diabetes + lipid-lowering medication use

Model 3: Model 2 + log-triglycerides

Model 4: Model 3 + log-HDL-C.

N/A: Not applicable

SI conversion factors: To convert total, LDL-C and HDL-C to mmol/L, multiple by 0.0249. To convert triglycerides to mmol/L, multiple by 0.0113

**Table S4. Hazard Ratios (95%CI) for ASCVD events across concordant/discordant groups by JUPITER cutpoints: the Atherosclerosis Risk in Communities Study (1996-2016).**

| Lipid Target Groups                                                       | hsCRP    | n ASCVD events/<br>n individuals | Model 1<br>HR (95%CI) | Model 2<br>HR (95%CI) | Model 3<br>HR (95%CI) | Model 4<br>HR (95%CI) |
|---------------------------------------------------------------------------|----------|----------------------------------|-----------------------|-----------------------|-----------------------|-----------------------|
| <b>LDL-C &lt; cutpoint</b><br>(n=5,623)                                   | < 2 mg/L | 313/2,547                        | REF                   | REF                   | REF                   | REF                   |
|                                                                           | ≥ 2 mg/L | 508/3,076                        | 1.58 (1.36-1.83)      | 1.41 (1.21-1.66)      | 1.37 (1.17-1.61)      | 1.37 (1.16-1.61)      |
| <b>LDL -C ≥ cutpoint</b><br>(n=4,125)                                     | < 2 mg/L | 277/1,766                        | REF                   | REF                   | REF                   | REF                   |
|                                                                           | ≥ 2 mg/L | 476/2,359                        | 1.48 (1.27-1.72)      | 1.30 (1.10-1.53)      | 1.28 (1.08-1.51)      | 1.27 (1.07-1.50)      |
| <b>Dual lipids &lt; cutpoint</b><br>(n=5,367)                             | < 2 mg/L | 300/2,450                        | REF                   | REF                   | REF                   | REF                   |
|                                                                           | ≥ 2 mg/L | 476/2,917                        | 1.56 (1.34-1.81)      | 1.41 (1.19-1.66)      | 1.36 (1.15-1.61)      | 1.36 (1.15-1.60)      |
| <b>Dual lipids ≥ cutpoint</b><br>(n=3,483)                                | < 2 mg/L | 239/1,447                        | REF                   | REF                   | REF                   | REF                   |
|                                                                           | ≥ 2 mg/L | 425/2,036                        | 1.45 (1.23-1.70)      | 1.28 (1.07-1.53)      | 1.27 (1.06-1.52)      | 1.26 (1.05-1.51)      |
| <b>Triple lipids &lt; cutpoint</b><br>(n=4,709)                           | < 2 mg/L | 252/2,208                        | REF                   | REF                   | REF                   | REF                   |
|                                                                           | ≥ 2 mg/L | 398/2,501                        | 1.60 (1.36-1.89)      | 1.45 (1.21-1.73)      | 1.41 (1.18-1.68)      | 1.40 (1.17-1.68)      |
| <b>Triple lipids ≥ cutpoint</b><br>(n=3,140)                              | < 2 mg/L | 215/1,294                        | REF                   | REF                   | REF                   | REF                   |
|                                                                           | ≥ 2 mg/L | 392/1,846                        | 1.46 (1.24-1.73)      | 1.27 (1.06-1.54)      | 1.27 (1.05-1.53)      | 1.26 (1.04-1.52)      |
| <b>Quadruple lipids &lt; cutpoint</b><br>(n=3,765)                        | < 2 mg/L | 189/1,797                        | REF                   | REF                   | REF                   | N/A                   |
|                                                                           | ≥ 2 mg/L | 279/1,968                        | 1.52 (1.25-1.84)      | 1.43 (1.15-1.76)      | 1.39 (1.12-1.72)      | N/A                   |
| <b>Quadruple lipids ≥ cutpoint</b><br>(n=3,371)                           | < 2 mg/L | 172/1,956                        | REF                   | REF                   | REF                   | N/A                   |
|                                                                           | ≥ 2 mg/L | 322/1,415                        | 1.45 (1.20-1.75)      | 1.28 (1.04-1.58)      | 1.28 (1.04-1.57)      | N/A                   |
| <b>Quadruple lipids &lt; cutpoint<br/>+ HDL-C ≥ cutpoint</b><br>(n=2,552) | < 2 mg/L | 127/1,252                        | REF                   | REF                   | REF                   | N/A                   |
|                                                                           | ≥ 2 mg/L | 163/1,300                        | 1.40 (1.10-1.79)      | 1.42 (1.09-1.86)      | 1.37 (1.02-1.80)      | N/A                   |
| <b>Quadruple lipids ≥ cutpoint<br/>+ HDL-C &lt; cutpoint</b><br>(n=2,027) | < 2 mg/L | 148/789                          | REF                   | REF                   | REF                   | N/A                   |
|                                                                           | ≥ 2 mg/L | 290/1,238                        | 1.46 (1.19-1.78)      | 1.30 (1.04-1.62)      | 1.26 (1.04-1.62)      | N/A                   |

Dual lipids: LDL-C + non-HDL-C; Triple lipids: LDL-C + non-HDL-C + apoB. Quadruple lipids: LDL-C + non-HDL-C + apoB + TC/HDL-C  
hsCRP <2 mg/L groups are reference.

Cutpoints: LDL-C: 130 mg/dL (percentile 57), non-HDL-C: 160 mg/dL, apoB: 102 mg/dL, TC/HDL: 4.4, HDL-C: 50 mg/dL, hsCRP: 2 mg/L

Model 1: adjusted for age, sex, race/center

Model 2: Model 1 + physical activity + smoking status + BMI+ systolic blood pressure + treatment for hypertension + diabetes + lipid-lowering medication use

Model 3: Model 2 + log-triglycerides

Model 4: Model 3 + log-HDL-C.

N/A: Not applicable

SI conversion factors: To convert total, LDL-C and HDL-C to mmol/L, multiple by 0.0249. To convert triglycerides to mmol/L, multiple by 0.0113.

**Table S5. Hazard Ratios (95%CI) for ASCVD events across concordant/discordant groups by JUPITER cutpoints and hsCRP categories: the Atherosclerosis Risk in Communities Study (1996-2016).**

| Lipid Target Groups                             | hsCRP        | n ASCVD events/<br>n individuals | Model 1<br>HR (95%CI) | Model 2<br>HR (95%CI) | Model 3<br>HR (95%CI) | Model 4<br>HR (95%CI) |
|-------------------------------------------------|--------------|----------------------------------|-----------------------|-----------------------|-----------------------|-----------------------|
| <b>LDL-C &lt; cutpoint</b><br>(n=5,623)         | <1 mg/L      | 154/1,375                        | REF                   | REF                   | REF                   | REF                   |
|                                                 | 1 to <2 mg/L | 159/1,172                        | 1.22 (0.98-1.53)      | 1.18 (0.93-1.50)      | 1.14 (0.90-1.44)      | 1.13 (0.89-1.43)      |
|                                                 | 2 to <3 mg/L | 105/664                          | 1.54 (1.20-1.97)      | 1.42 (1.09-1.85)      | 1.36 (1.04-1.78)      | 1.35 (1.03-1.76)      |
|                                                 | ≥3 mg/L      | 403/2,412                        | 1.81 (1.50-2.20)      | 1.59 (1.28-1.97)      | 1.51 (1.21-1.87)      | 1.50 (1.21-1.86)      |
| <b>LDL -C ≥ cutpoint</b><br>(n=4,125)           | <1 mg/L      | 122/858                          | REF                   | REF                   | REF                   | REF                   |
|                                                 | 1 to <2 mg/L | 155/908                          | 1.24 (0.97-1.57)      | 1.15 (0.89-1.47)      | 1.13 (0.88-1.46)      | 1.12 (0.87-1.44)      |
|                                                 | 2 to <3 mg/L | 89/563                           | 1.15 (0.87-1.51)      | 1.12 (0.84-1.49)      | 1.10 (0.83-1.47)      | 1.09 (0.82-1.46)      |
|                                                 | ≥3 mg/L      | 386/1,795                        | 1.86 (1.51-2.29)      | 1.51 (1.20-1.91)      | 1.48 (1.17-1.87)      | 1.46 (1.15-1.84)      |
| <b>Dual lipids &lt; cutpoint</b><br>(n=5,367)   | <1 mg/L      | 145/1,336                        | REF                   | REF                   | REF                   | REF                   |
|                                                 | 1 to <2 mg/L | 155/1,114                        | 1.29 (1.03-1.62)      | 1.26 (0.99-1.60)      | 1.20 (0.94-1.54)      | 1.20 (0.94-1.52)      |
|                                                 | 2 to <3 mg/L | 99/632                           | 1.56 (1.21-2.02)      | 1.44 (1.10-1.90)      | 1.38 (1.05-1.83)      | 1.37 (1.04-1.81)      |
|                                                 | ≥3 mg/L      | 377/2,285                        | 1.84 (1.51-2.24)      | 1.64 (1.31-2.04)      | 1.55 (1.24-1.93)      | 1.54 (1.23-1.93)      |
| <b>Dual lipids ≥ cutpoint</b><br>(n=3,483)      | <1 mg/L      | 107/683                          | REF                   | REF                   | REF                   | REF                   |
|                                                 | 1 to <2 mg/L | 132/764                          | 1.14 (0.88-1.47)      | 1.08 (0.82-1.41)      | 1.07 (0.82-1.40)      | 1.06 (0.81-1.39)      |
|                                                 | 2 to <3 mg/L | 78/470                           | 1.10 (0.82-1.48)      | 1.06 (0.78-1.44)      | 1.05 (0.77-1.43)      | 1.04 (0.76-1.42)      |
|                                                 | ≥3 mg/L      | 346/1,565                        | 1.71 (1.38-2.14)      | 1.44 (1.13-1.83)      | 1.42 (1.11-1.82)      | 1.40 (1.10-1.79)      |
| <b>Triple lipids &lt; cutpoint</b><br>(n=4,709) | <1 mg/L      | 126/1,228                        | REF                   | REF                   | REF                   | REF                   |
|                                                 | 1 to <2 mg/L | 126/980                          | 1.29 (1.01-1.65)      | 1.24 (0.95-1.61)      | 1.19 (0.92-1.55)      | 1.18 (0.91-1.54)      |
|                                                 | 2 to <3 mg/L | 89/551                           | 1.71 (1.30-2.24)      | 1.55 (1.15-2.08)      | 1.49 (1.11-2.00)      | 1.48 (1.10-1.99)      |

|                                                                       |              |           |                  |                  |                  |                  |
|-----------------------------------------------------------------------|--------------|-----------|------------------|------------------|------------------|------------------|
|                                                                       | ≥3 mg/L      | 309/1,950 | 1.84 (1.49-2.28) | 1.64 (1.29-2.08) | 1.56 (1.23-1.98) | 1.55 (1.22-1.97) |
| <b>Triple lipids ≥ cutpoint</b><br>(n=3,140)                          | <1 mg/L      | 98/610    | REF              | REF              | REF              | REF              |
|                                                                       | 1 to <2 mg/L | 117/684   | 1.11 (0.84-1.45) | 1.05 (0.79-1.40) | 1.05 (0.79-1.39) | 1.04 (0.78-1.38) |
|                                                                       | 2 to <3 mg/L | 74/426    | 1.12 (0.83-1.52) | 1.06 (0.77-1.47) | 1.06 (0.77-1.46) | 1.05 (0.76-1.45) |
|                                                                       | ≥3 mg/L      | 317/1,419 | 1.70 (1.35-2.14) | 1.41 (1.09-1.81) | 1.39 (1.08-1.80) | 1.37 (1.06-1.78) |
| <b>Quadruple lipids &lt; cutpoint</b><br>(n=3,765)                    | <1 mg/L      | 100/1,035 | REF              | REF              | REF              | REF              |
|                                                                       | 1 to <2 mg/L | 89/762    | 1.26 (0.94-1.70) | 1.23 (0.91-1.67) | 1.20 (0.88-1.63) | N/A              |
|                                                                       | 2 to <3 mg/L | 55/417    | 1.48 (1.06-2.06) | 1.36 (0.95-1.96) | 1.32 (0.92-1.90) | N/A              |
|                                                                       | ≥3 mg/L      | 224/1,551 | 1.75 (1.37-2.24) | 1.66 (1.26-2.18) | 1.60 (1.21-2.10) | N/A              |
| <b>Quadruple lipids ≥ cutpoint</b><br>(n=3,371)                       | <1 mg/L      | 77/439    | REF              | REF              | REF              | REF              |
|                                                                       | 1 to <2 mg/L | 95/517    | 1.09 (0.81-1.47) | 1.05 (0.76-1.44) | 1.04 (0.76-1.43) | N/A              |
|                                                                       | 2 to <3 mg/L | 66/329    | 1.18 (0.85-1.64) | 1.15 (0.81-1.63) | 1.14 (0.81-1.62) | N/A              |
|                                                                       | ≥3 mg/L      | 255/1,085 | 1.65 (1.27-2.13) | 1.38 (1.04-1.84) | 1.37 (1.03-1.83) | N/A              |
| <b>Quadruple lipids &lt; cutpoint + HDL-C ≥ cutpoint</b><br>(n=2,552) | <1 mg/L      | 72/753    | REF              | REF              | REF              | REF              |
|                                                                       | 1 to <2 mg/L | 55/499    | 1.25 (0.88-1.79) | 1.29 (0.88-1.89) | 1.25 (0.85-1.83) | N/A              |
|                                                                       | 2 to <3 mg/L | 35/267    | 1.56 (1.04-2.34) | 1.53 (0.99-2.37) | 1.48 (0.95-2.30) | N/A              |
|                                                                       | ≥3 mg/L      | 128/1,033 | 1.54 (1.13-2.09) | 1.62 (1.15-2.28) | 1.53 (1.08-2.17) | N/A              |
| <b>Quadruple lipids ≥ cutpoint + HDL-C &lt; cutpoint</b><br>(n=2,027) | <1 mg/L      | 66/361    | REF              | REF              | REF              | REF              |
|                                                                       | 1 to <2 mg/L | 82/428    | 1.08 (0.78-1.49) | 1.05 (0.74-1.48) | 1.05 (0.74-1.48) | N/A              |
|                                                                       | 2 to <3 mg/L | 60/290    | 1.17 (0.83-1.67) | 1.14 (0.79-1.65) | 1.14 (0.79-1.65) | N/A              |
|                                                                       | ≥3 mg/L      | 229/947   | 1.65 (1.25-2.18) | 1.41 (1.04-1.92) | 1.41 (1.03-1.91) | N/A              |

Dual lipids: LDL-C + non-HDL-C; Triple lipids: LDL-C + non-HDL-C + apoB. Quadruple lipids: LDL-C + non-HDL-C + apoB + TC/HDL-C

hsCRP <1 mg/L is reference group

**Cutpoints: LDL-C: 130 mg/dL (percentile 57), non-HDL-C: 160 mg/dL, apoB: 102 mg/dL, TC/HDL: 4.4, HDL-C: 50 mg/dL, hsCRP: 2 mg/L**

Model 1: adjusted for age, sex, race/center

Model 2: Model 1 + physical activity + smoking status + BMI+ systolic blood pressure + treatment for hypertension + diabetes + lipid-lowering medication use

Model 3: Model 2 + log-triglycerides

Model 4: Model 3 + log-HDL-C

N/A: Not applicable

SI conversion factors: To convert total, LDL-C and HDL-C to mmol/L, multiple by 0.0249. To convert triglycerides to mmol/L, multiple by 0.0113.



**Table S6. Hazard Ratios (95%CI) for ASCVD events across concordant/discordant groups by high-risk cutpoints: the Atherosclerosis Risk in Communities Study (1996-2016).**

| Lipid Target Groups                                                   | hsCRP    | n ASCVD events/<br>n individuals | Model 1<br>HR (95%CI) | Model 2<br>HR (95%CI) | Model 3<br>HR (95%CI) | Model 4<br>HR (95%CI) |
|-----------------------------------------------------------------------|----------|----------------------------------|-----------------------|-----------------------|-----------------------|-----------------------|
| <b>LDL-C &lt; cutpoint</b><br>(n=2,066)                               | < 2 mg/L | 114/962                          | REF                   | REF                   | REF                   | REF                   |
|                                                                       | ≥ 2 mg/L | 163/1,104                        | 1.41 (1.10-1.81)      | 1.41 (1.06-1.86)      | 1.35 (1.02-1.79)      | 1.35 (1.02-1.79)      |
| <b>LDL -C ≥ cutpoint</b><br>(n=7,682)                                 | < 2 mg/L | 476/3,351                        | REF                   | REF                   | REF                   | REF                   |
|                                                                       | ≥ 2 mg/L | 821/4,331                        | 1.57 (1.40-1.76)      | 1.35 (1.19-1.54)      | 1.32 (1.16-1.50)      | 1.31 (1.15-1.49)      |
| <b>Dual lipids &lt; cutpoint</b><br>(n=1,957)                         | < 2 mg/L | 109/924                          | REF                   | REF                   | REF                   | REF                   |
|                                                                       | ≥ 2 mg/L | 151/1,033                        | 1.39 (1.08-1.80)      | 1.42 (1.07-1.90)      | 1.35 (1.01-1.81)      | 1.36 (1.01-1.81)      |
| <b>Dual lipids ≥ cutpoint</b><br>(n=6,811)                            | < 2 mg/L | 429/2,902                        | REF                   | REF                   | REF                   | REF                   |
|                                                                       | ≥ 2 mg/L | 752/3,909                        | 1.53 (1.35-1.73)      | 1.33 (1.16-1.52)      | 1.29 (1.13-1.48)      | 1.29 (1.13-1.47)      |
| <b>Triple lipids &lt; cutpoint</b><br>(n=1,489)                       | < 2 mg/L | 86/731                           | REF                   | REF                   | REF                   | REF                   |
|                                                                       | ≥ 2 mg/L | 118/758                          | 1.50 (1.12-2.00)      | 1.52 (1.10-2.10)      | 1.45 (1.05-2.01)      | 1.45 (1.05-2.01)      |
| <b>Triple lipids ≥ cutpoint</b><br>(n=6,624)                          | < 2 mg/L | 417/2,820                        | REF                   | REF                   | REF                   | REF                   |
|                                                                       | ≥ 2 mg/L | 730/3,804                        | 1.53 (1.35-1.73)      | 1.35 (1.18-1.55)      | 1.32 (1.15-1.51)      | 1.31 (1.14-1.50)      |
| <b>Quadruple lipids &lt; cutpoint</b><br>(n=976)                      | < 2 mg/L | 55/500                           | REF                   | REF                   | REF                   | N/A                   |
|                                                                       | ≥ 2 mg/L | 65/476                           | 1.40 (0.96-2.04)      | 1.49 (0.98-2.25)      | 1.44 (0.95-2.19)      | N/A                   |
| <b>Quadruple lipids ≥ cutpoint</b><br>(n=6,200)                       | < 2 mg/L | 403/2,612                        | REF                   | REF                   | REF                   | N/A                   |
|                                                                       | ≥ 2 mg/L | 703/3,588                        | 1.48 (1.30-1.67)      | 1.32 (1.15-1.51)      | 1.29 (1.12-1.48)      | N/A                   |
| <b>Quadruple lipids &lt; cutpoint + HDL-C ≥ cutpoint</b><br>(n=907)   | < 2 mg/L | 52/469                           | REF                   | REF                   | REF                   | N/A                   |
|                                                                       | ≥ 2 mg/L | 56/438                           | 1.29 (0.87-1.91)      | 1.32 (0.86-2.04)      | 1.30 (0.84-2.01)      | N/A                   |
| <b>Quadruple lipids ≥ cutpoint + HDL-C &lt; cutpoint</b><br>(n=4,017) | < 2 mg/L | 281/1,652                        | REF                   | REF                   | REF                   | N/A                   |
|                                                                       | ≥ 2 mg/L | 515/2,365                        | 1.48 (1.28-1.72)      | 1.34 (1.14-1.58)      | 1.33 (1.13-1.56)      | N/A                   |

Dual lipids: LDL-C + non-HDL-C; Triple lipids: LDL-C + non-HDL-C + apoB. Quadruple lipids: LDL-C + non-HDL-C + apoB + TC/HDL-C

hsCRP <2 mg/L groups are reference.

**Cutpoints: LDL-C: 100 mg/dL (percentile 21), non-HDL-C: 130 mg/dL, apoB: 80 mg/dL, TC/HDL: 3.1, HDL-C: 50 mg/dL, hsCRP: 2 mg/L**

Model 1: adjusted for age, sex, race/center

Model 2: Model 1 + physical activity + smoking status + BMI+ systolic blood pressure + treatment for hypertension + diabetes + lipid-lowering medication use

Model 3: Model 2 + log-triglycerides

Model 4: Model 3 + log-HDL-C.

N/A: Not applicable

SI conversion factors: To convert total, LDL-C and HDL-C to mmol/L, multiple by 0.0249. To convert triglycerides to mmol/L, multiple by 0.0113

**Table S7. Time-Varying Hazard Ratios (95%CI) for ASCVD events across concordant/discordant groups by medians: the Atherosclerosis Risk in Communities Study (1996-2016).**

| Lipid Target Groups                                               | hsCRP    | n ASCVD events/<br>n individuals | Model 1<br>HR (95%CI) | Model 2<br>HR (95%CI) | Model 3<br>HR (95%CI) | Model 4<br>HR (95%CI) |
|-------------------------------------------------------------------|----------|----------------------------------|-----------------------|-----------------------|-----------------------|-----------------------|
| <b>LDL-C &lt; median</b><br>(n=4,797)                             | < median | 308/2,438                        | REF                   | REF                   | REF                   | REF                   |
|                                                                   | ≥ median | 379/2,359                        | 1.48 (1.26-1.73)      | 1.40 (1.17-1.66)      | 1.37 (1.15-1.64)      | 1.37 (1.15-1.64)      |
| <b>LDL-C ≥ median</b><br>(n=4,951)                                | < median | 373/2,432                        | REF                   | REF                   | REF                   | REF                   |
|                                                                   | ≥ median | 514/2,519                        | 1.43 (1.25-1.65)      | 1.30 (1.11-1.51)      | 1.27 (1.09-1.49)      | 1.27 (1.09-1.49)      |
| <b>Dual lipids &lt; median</b><br>(n=4,445)                       | < median | 283/2,295                        | REF                   | REF                   | REF                   | REF                   |
|                                                                   | ≥ median | 340/2,150                        | 1.44 (1.22-1.70)      | 1.39 (1.16-1.67)      | 1.37 (1.14-1.65)      | 1.37 (1.14-1.65)      |
| <b>Dual lipids ≥ median</b><br>(n=4,549)                          | < median | 350/2,211                        | REF                   | REF                   | REF                   | REF                   |
|                                                                   | ≥ median | 485/2,338                        | 1.46 (1.27-1.69)      | 1.36 (1.16-1.59)      | 1.34 (1.15-1.58)      | 1.34 (1.15-1.58)      |
| <b>Triple lipids &lt; median</b><br>(n=3,938)                     | < median | 237/2,060                        | REF                   | REF                   | REF                   | REF                   |
|                                                                   | ≥ median | 290/1,878                        | 1.54 (1.29-1.85)      | 1.45 (1.18-1.77)      | 1.44 (1.18-1.76)      | 1.44 (1.18-1.76)      |
| <b>Triple lipids ≥ median</b><br>(n=4,064)                        | < median | 315/1,954                        | REF                   | REF                   | REF                   | REF                   |
|                                                                   | ≥ median | 442/2,110                        | 1.42 (1.23-1.65)      | 1.29 (1.09-1.52)      | 1.28 (1.08-1.51)      | 1.28 (1.08-1.51)      |
| <b>Quadruple lipids &lt; median</b><br>(n=3,120)                  | < median | 171/1,660                        | REF                   | REF                   | REF                   | N/A                   |
|                                                                   | ≥ median | 207/1,460                        | 1.50 (1.21-1.86)      | 1.48 (1.16-1.88)      | 1.47 (1.15-1.87)      | N/A                   |
| <b>Quadruple lipids ≥ median</b><br>(n=3,079)                     | < median | 257/1,460                        | REF                   | REF                   | REF                   | N/A                   |
|                                                                   | ≥ median | 362/1,619                        | 1.36 (1.16-1.61)      | 1.19 (0.99-1.43)      | 1.19 (0.99-1.43)      | N/A                   |
| <b>Quadruple lipids &lt; median + HDL-C ≥ median</b><br>(n=2,971) | < median | 159/1,574                        | REF                   | REF                   | REF                   | N/A                   |
|                                                                   | ≥ median | 189/1,397                        | 1.45 (1.16-1.82)      | 1.47 (1.15-1.89)      | 1.46 (1.13-1.87)      | N/A                   |
| <b>Quadruple lipids ≥ median + HDL-C &lt; median</b><br>(n=1,253) | < median | 116/557                          | REF                   | REF                   | REF                   | N/A                   |
|                                                                   | ≥ median | 174/696                          | 1.29 (1.01-1.64)      | 1.11 (0.85-1.47)      | 1.12 (0.85-1.48)      | N/A                   |

Dual lipids: LDL-C + non-HDL-C; Triple lipids: LDL-C + non-HDL-C + apoB. Quadruple lipids: LDL-C + non-HDL-C + apoB + TC/HDL-C  
hsCRP <median groups are reference.

**Medians: LDL-C: 123 mg/dL, non-HDL-C: 149 mg/dL, apoB: 98 mg/dL, TC/HDL: 4.2, HDL-C: 40 mg/dL, hsCRP: 2.4 mg/L**

Model 1: adjusted for age, sex, race/center

Model 2: Model 1 + physical activity + smoking status (time-varying) + BMI (time-varying) + systolic blood pressure (time-varying) + treatment for hypertension (time-varying) + diabetes (time-varying) + lipid-lowering medications use (time-varying)

Model 3: Model 2 + log-triglycerides

Model 4: Model 3 + log-HDL-C.

N/A: Not applicable

SI conversion factors: To convert total, LDL-C and HDL-C to mmol/L, multiple by 0.0249. To convert triglycerides to mmol/L, multiple by 0.0113.

**Figure S1. Proportions of hsCRP > and ≤median in single, dual, triple, quadruple and quintuple lipid group < and ≥median.**

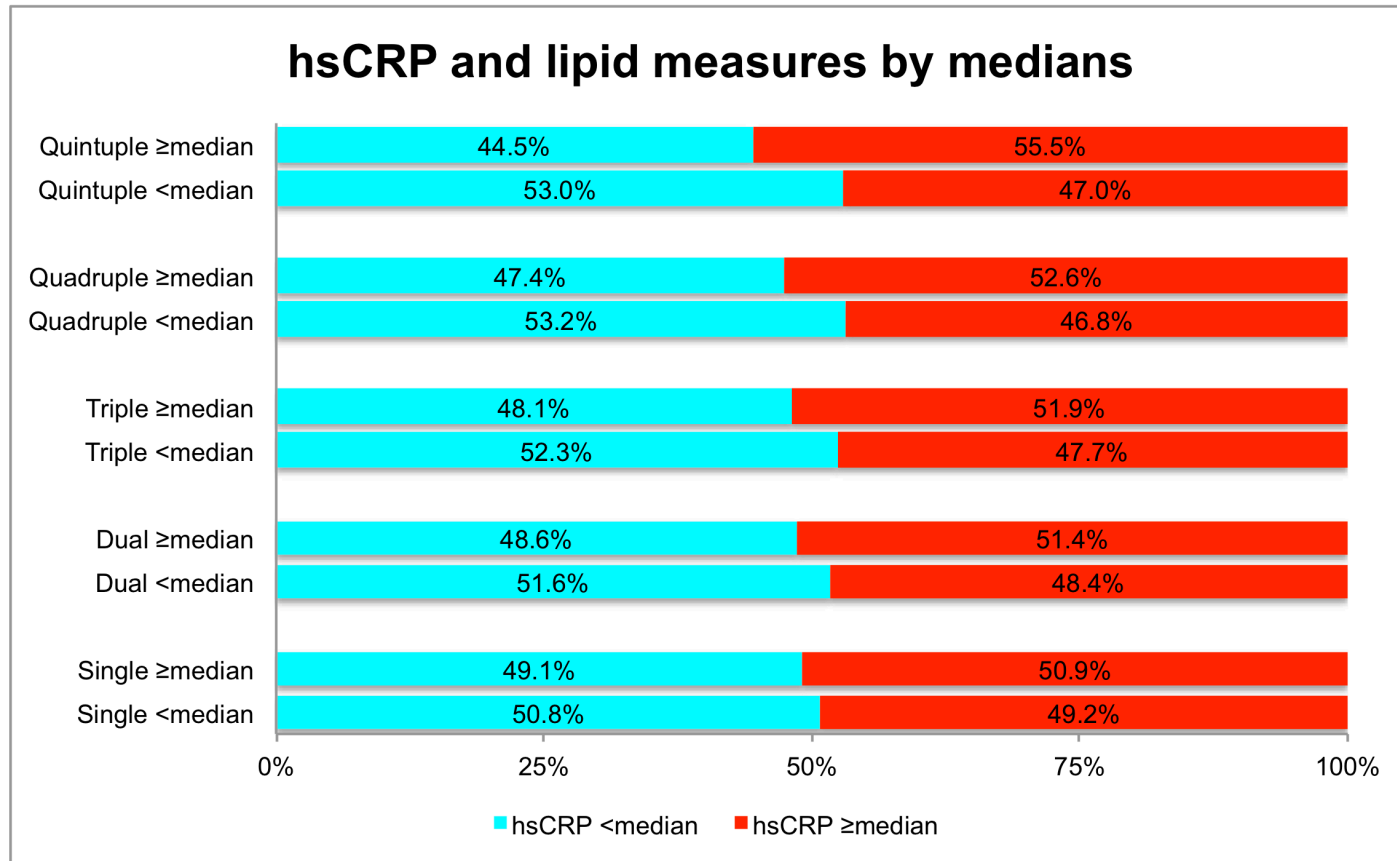

**Figure S2. Proportions of hsCRP > and ≤2mg/L in single, dual, triple, quadruple and quintuple lipid groups < and ≥JUPITER cutpoints.**

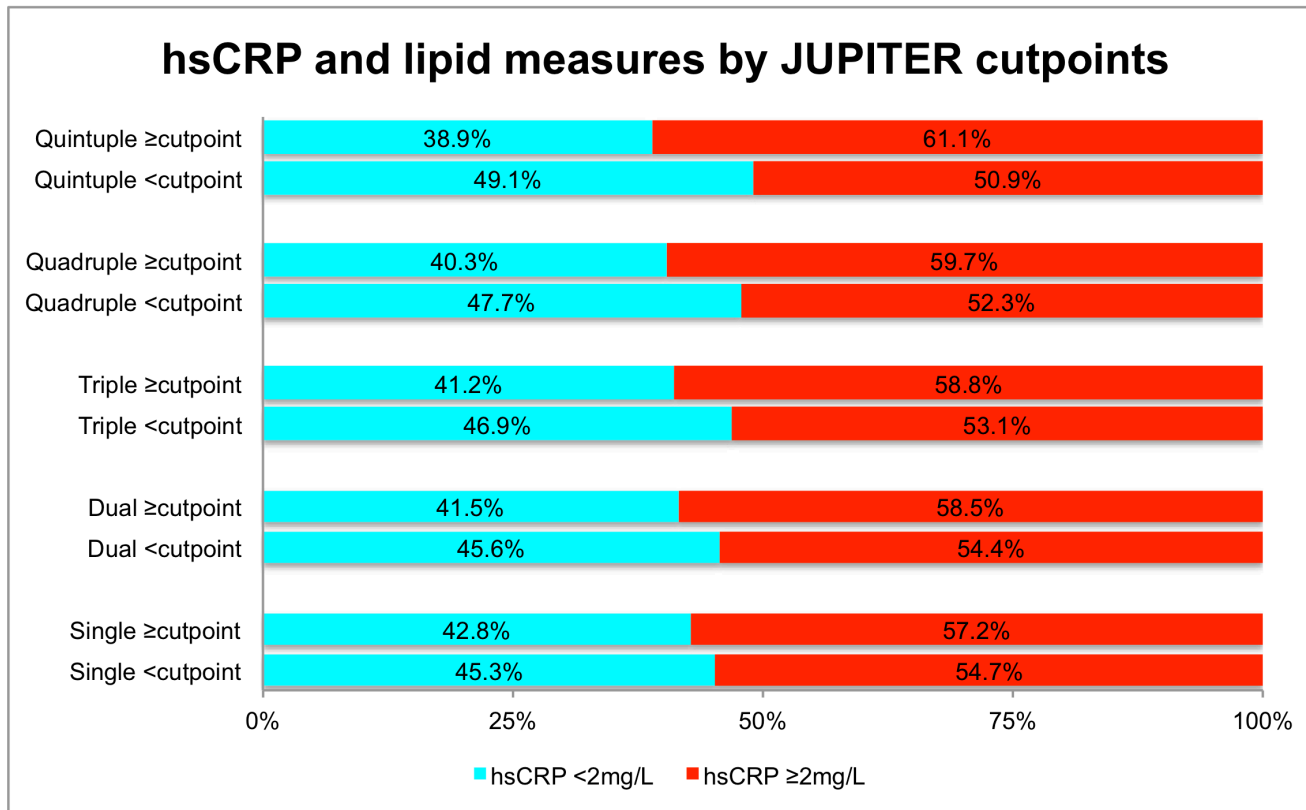

**Figure S3. Kaplan-Meier curves for event-free survival of incident heart failure by hsCRP < and  $\geq$ median among individuals with triple (A), quadruple (B) lipid measures < median (left) and  $\geq$  median (right)**

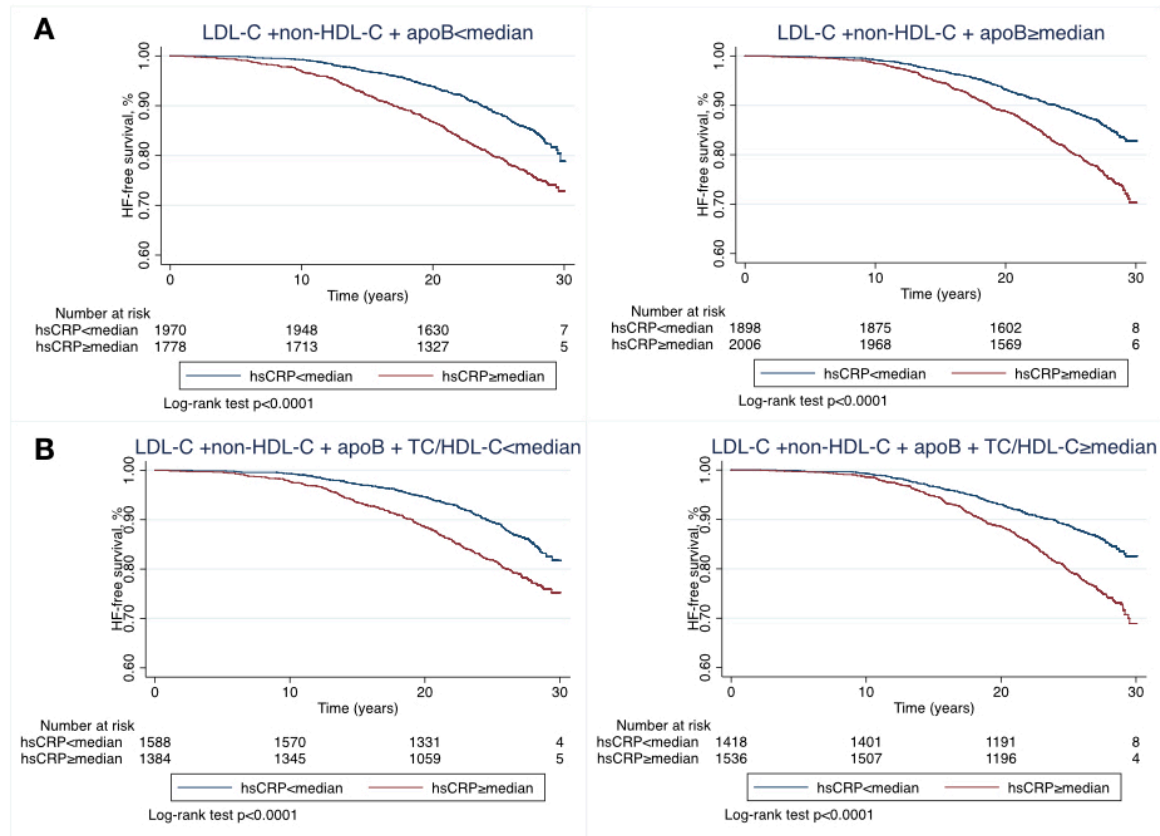

**Figure S4. Kaplan-Meier curves for event-free survival of total mortality by hsCRP < and  $\geq$ median among individuals with triple (A), quadruple (B) lipid measures < median (left) and  $\geq$  median (right)**

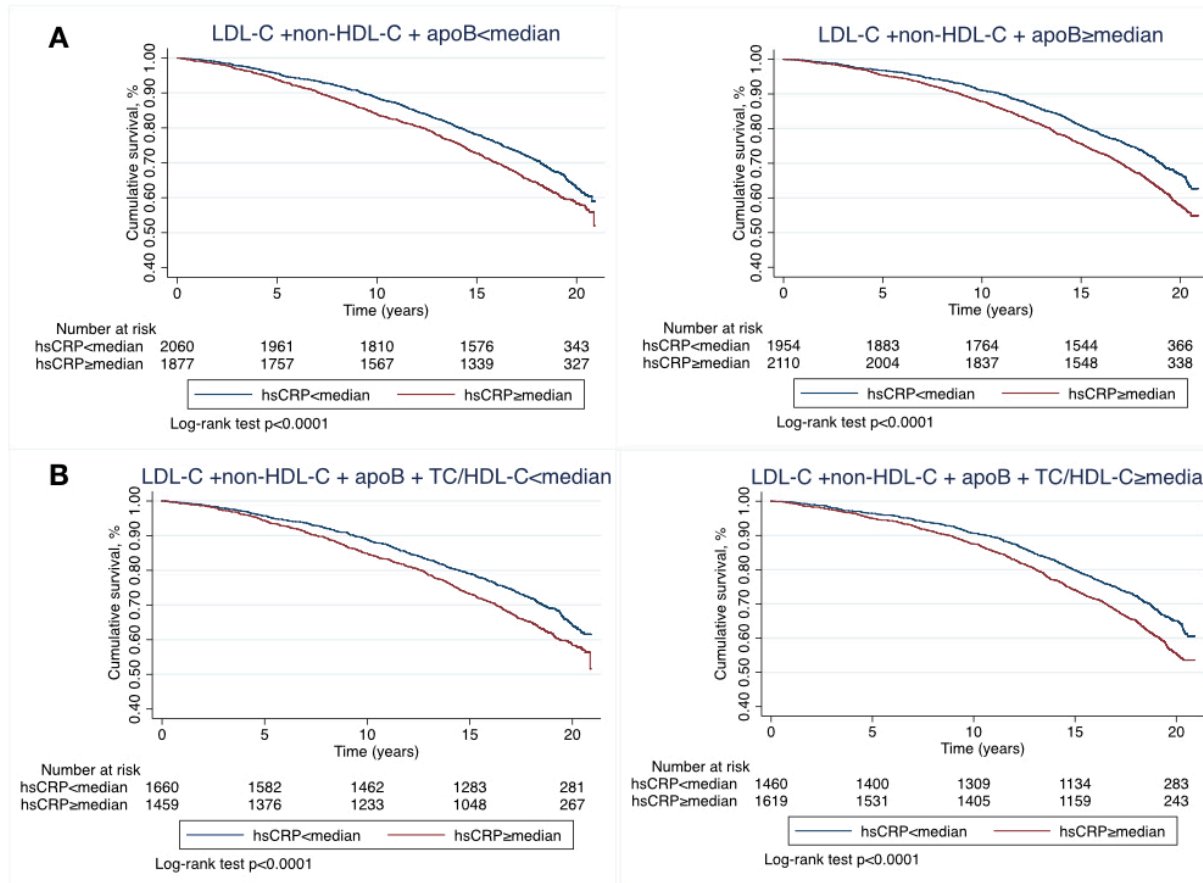

Supplement: JAH3-9-e013600-s001.pdf [file JAH3-9-e013600-s001.pdf]
